# Supplementary material
Source: PubMed Central journal article supplement (PMC2756605)
Supplement: NIHMS101467-supplement-01.pdf [file NIHMS101467-supplement-01.pdf]

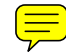

A

**Class I mRNAs**

| RefSeq    | Description                                   | Gene Name      | Fold-enrichment | p value |
|-----------|-----------------------------------------------|----------------|-----------------|---------|
| NM_009598 | Angiotensin I converting enzyme 1             | CD143/Ace      | 1.83            | 0.0032  |
| NM_009673 | Annexin A5                                    | Anx5           | 1.53            | 0.0063  |
| NM_007527 | Bcl2-associated X protein                     | BAX            | 1.95            | 0.0664  |
| NM_009741 | B-cell leukemia/lymphoma 2                    | Bcl-2          | 2.79            | 0.0101  |
| NM_009743 | Bcl2-like 1                                   | Bcl(X)L/Bcl-XL | 3.72            | 0.0001  |
| NM_007465 | Baculoviral IAP repeat-containing 2           | clAP2/Api1     | 2.51            | 0.0432  |
| NM_009810 | Caspase 3                                     | CPP32/Apopain  | 2.58            | 0.0111  |
| NM_009811 | Caspase 6                                     | Mch2/mCASP-6   | 3.89            | 0.00001 |
| NM_009805 | CASP8 and FADD-like apoptosis regulator       | Casper/c-Flip  | 3.29            | 0.0007  |
| NM_009142 | Chemokine (C-X3-C motif) ligand 1             | Cxc3/Scyd1     | 1.35            | 0.2068  |
| NM_010197 | Fibroblast growth factor 1                    | Dffrx/Fam      | -1.29           | 0.3899  |
| NM_008402 | Integrin alpha V                              | CD51/Itgav     | 2.49            | 0.0099  |
| NM_010578 | Integrin beta 1 (fibronectin receptor beta)   | CD29/Fnrb      | 3.09            | 0.0003  |
| NM_021099 | Kit oncogene                                  | CD117/c-KIT    | 3.80            | 0.0002  |
| NM_008827 | Placental growth factor                       | Plgf           | 5.82            | 0.0005  |
| NM_008872 | Plasminogen activator, tissue                 | tPA            | 2.24            | 0.0078  |
| NM_008871 | Serine peptidase inhibitor, clade E, member 1 | PAI-1/Serpine1 | 8.80            | 0.002   |
| NM_011577 | Transforming growth factor, beta 1            | TGF-beta1/Tgfb | 6.67            | 0.0012  |
| NM_009505 | Vascular endothelial growth factor A          | VEGF-A/VEGF120 | 1.97            | 0.0347  |

B

**Class II mRNAs**

| RefSeq    | Description                                   | Gene Name         | Fold-enrichment | p value |
|-----------|-----------------------------------------------|-------------------|-----------------|---------|
| NM_009615 | A disintegrin and metallopeptidase domain 17  | CD156b/ADAM17     | 4.50            | 0.001   |
| NM_009640 | Angiopoietin 1                                | Ang-1             | 12.08           | 0.00001 |
| NM_009868 | Cadherin 5                                    | CD144/VE-Cadherin | 29.84           | 0.00001 |
| NM_009929 | Procollagen, type XVIII, alpha 1              | endostatin        | 2.58            | 0.0007  |
| NM_007987 | Fas (TNF receptor superfamily member)         | CD95/APO-1        | 12.89           | 0.001   |
| NM_010228 | FMS-like tyrosine kinase 1                    | VEGFR-1/Fit-1     | 40.50           | 0.00001 |
| NM_010233 | Fibronectin 1                                 | Fn-1              | 38.89           | 0.00001 |
| NM_010493 | Intercellular adhesion molecule               | CD54/Icam-1       | 15.68           | 0.0007  |
| NM_010612 | Kinase insert domain protein receptor         | VEGFR-2/Flk-1     | 27.58           | 0.0004  |
| NM_008713 | Nitric oxide synthase 3, endothelial cell     | eNOS/Nos-3        | 15.40           | 0.0001  |
| NM_008756 | Occludin                                      | Ocln              | 38.34           | 0.00001 |
| NM_008816 | Platelet/endothelial cell adhesion molecule 1 | Cd31/PECAM-1      | 14.91           | 0.00001 |
| NM_011345 | Selectin, endothelial cell                    | CD62E/E-selectin  | 65.07           | 0.001   |
| NM_013690 | Endothelial-specific receptor tyrosine kinase | Cd202b/Tie2       | 24.96           | 0.0001  |
| NM_011708 | Von Willebrand factor homolog                 | Vwf               | 7.32            | 0.001   |

C

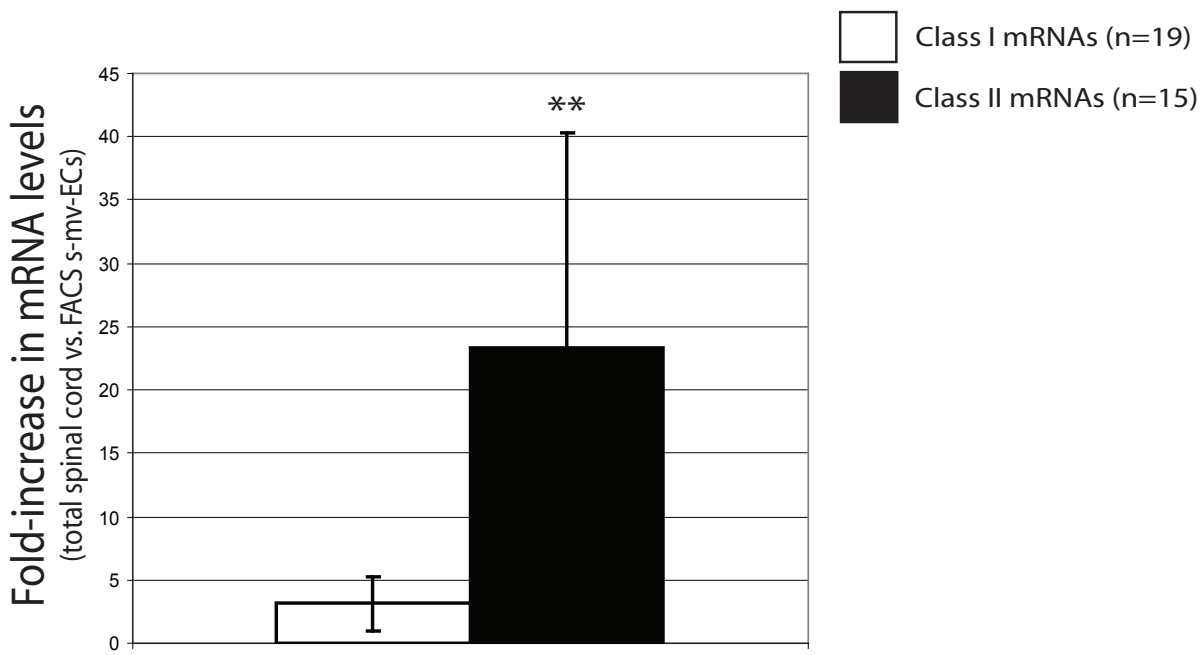

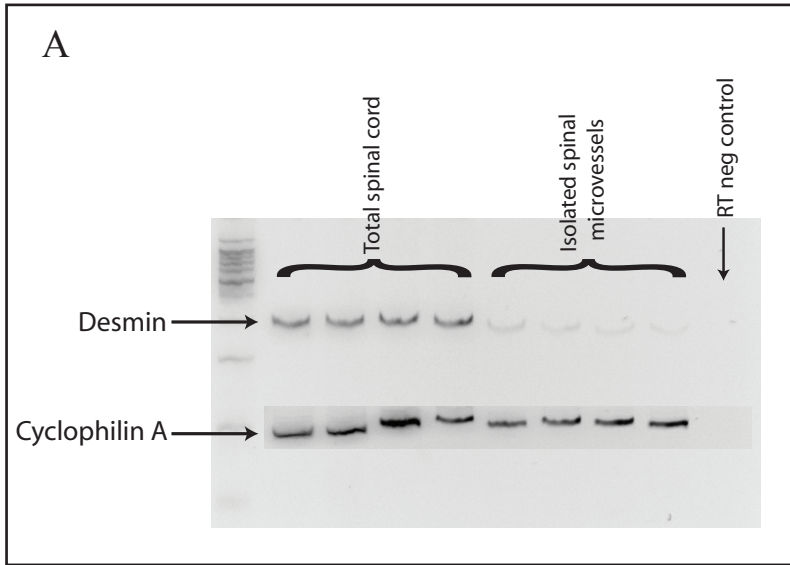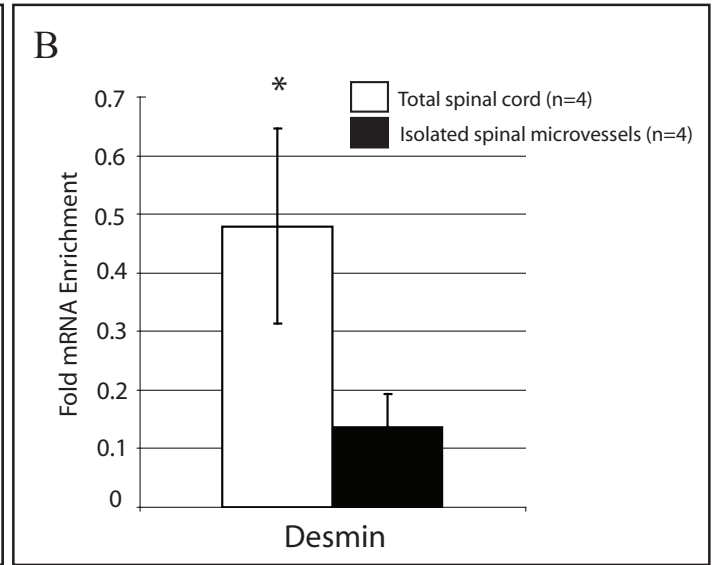

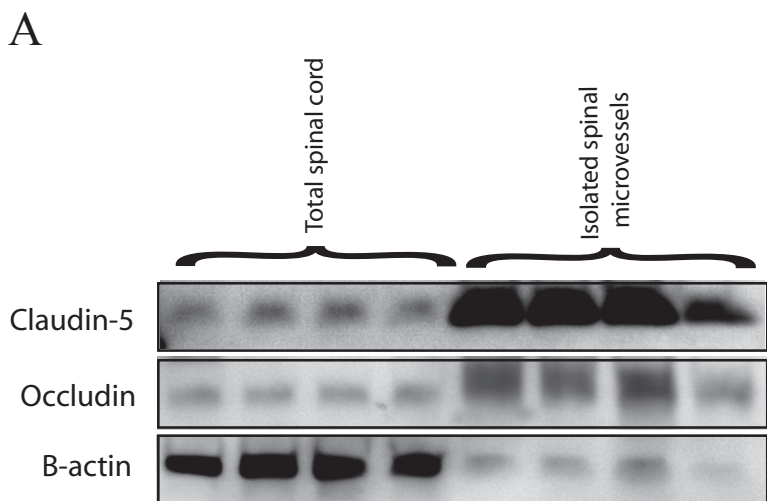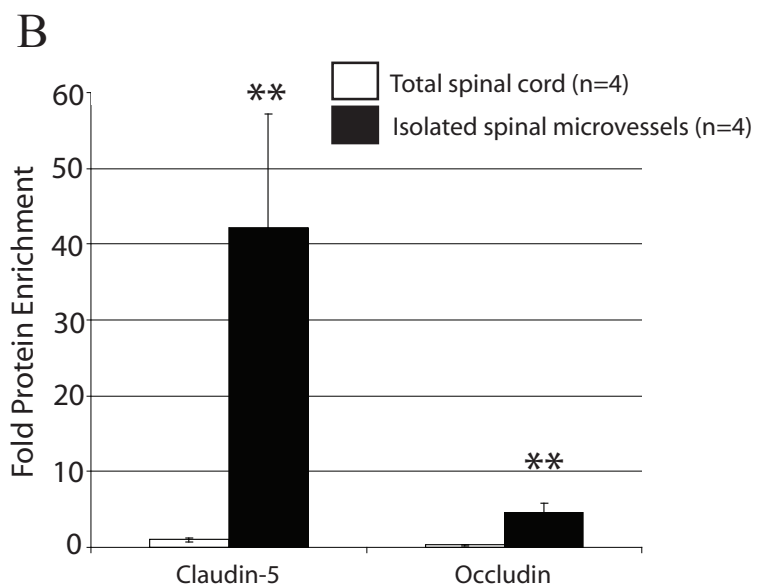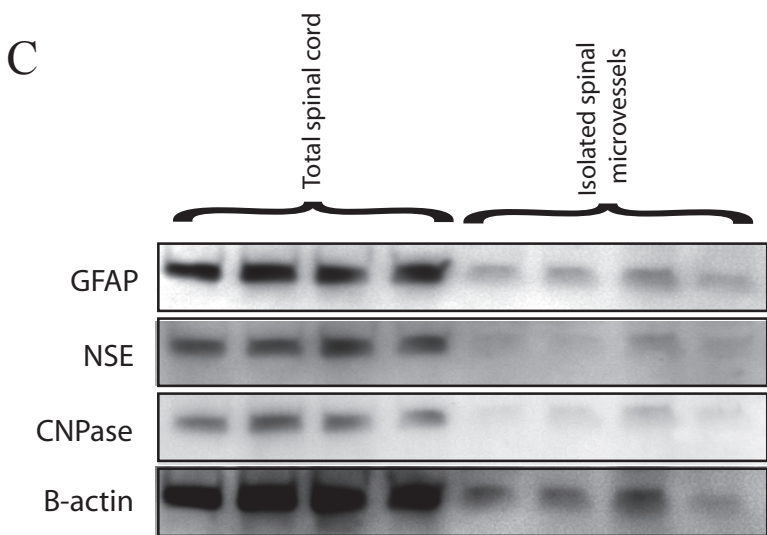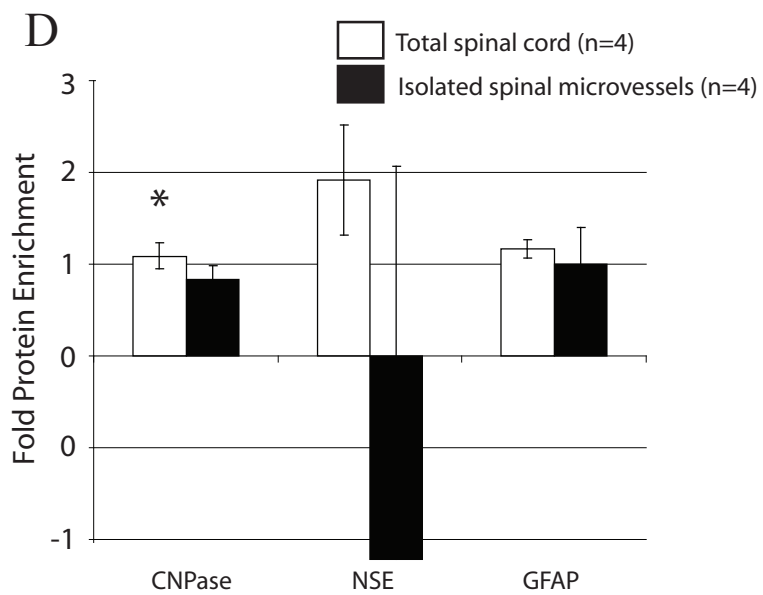





Control FACS Purified s-mv-ECs vs. 24 hour SCI FACS Purified s-mv-ECs  
Complete Microarray Data Set

| UniGene   | RefSeq    | Symbol   | Description                                                     | Gene Name                   | Average $\Delta C_t$ |                      | $2^{-\Delta C_t}$   |                      | Fold Difference<br>24 hr SCI/control s-mv-ECs | T-test<br>p value | Fold Dysregulation<br>24 hr SCI/control s-mv-ECs |
|-----------|-----------|----------|-----------------------------------------------------------------|-----------------------------|----------------------|----------------------|---------------------|----------------------|-----------------------------------------------|-------------------|--------------------------------------------------|
|           |           |          |                                                                 |                             | control<br>s-mv-ECs  | 24hr SCI<br>s-mv-ECs | control<br>s-mv-ECs | 24hr SCI<br>s-mv-ECs |                                               |                   |                                                  |
| Mm.754    | NM_009598 | Ace      | Angiotensin I converting enzyme (peptidyl-dipeptidase A) 1      | AW208573/CD143              | 4.78                 | 8.64                 | 3.6E-02             | 2.5E-03              | 14.52                                         | 0.0009            | 14.52                                            |
| Mm.301626 | NM_007428 | Agt      | Angiotensinogen (serpin peptidase inhibitor, clade A, member 8) | AI265500/Aogen              | 3.90                 | 1.98                 | 6.7E-02             | 2.5E-01              | 0.26                                          | 0.0110            | -3.79                                            |
| Mm.309336 | NM_009640 | Angpt1   | Angiopoietin 1                                                  | 1110046021Rik/Ang-1         | 0.84                 | 3.93                 | 5.6E-01             | 6.5E-02              | 8.54                                          | 0.0062            | 8.54                                             |
| Mm.1620   | NM_009673 | Anxa5    | Annexin A5                                                      | Anx5/R74653                 | 2.41                 | 2.60                 | 1.9E-01             | 1.7E-01              | 1.14                                          | 0.5801            | 1.14                                             |
| Mm.19904  | NM_007527 | Bax      | Bcl2-associated X protein                                       | BAX                         | 3.31                 | 3.54                 | 1.0E-01             | 8.6E-02              | 1.17                                          | 0.7464            | 1.17                                             |
| Mm.238213 | NM_009743 | Bcl2l1   | Bcl2-like 1                                                     | Bcl(X)L/Bcl-XL              | 2.04                 | 1.73                 | 2.4E-01             | 3.0E-01              | 0.81                                          | 0.3376            | -1.24                                            |
| Mm.335659 | NM_007465 | Birc2    | Baculoviral IAP repeat-containing 2                             | AW146227/Api1               | 4.78                 | 5.47                 | 3.6E-02             | 2.3E-02              | 1.61                                          | 0.3963            | 1.61                                             |
| Mm.6246   | NM_007551 | Blr1     | Burkitt lymphoma receptor 1                                     | CXC-R5/CXCR-5               | 3.92                 | 7.84                 | 6.6E-02             | 4.4E-03              | 15.19                                         | 0.0005            | 15.19                                            |
| Mm.34405  | NM_009810 | Casp3    | Caspase 3                                                       | A830040C14Rik/Apopain       | 2.80                 | 5.86                 | 1.4E-01             | 1.7E-02              | 8.36                                          | 0.0142            | 8.36                                             |
| Mm.281379 | NM_009811 | Casp6    | Caspase 6                                                       | Mch2/mCASP-6                | 4.32                 | 5.48                 | 5.0E-02             | 2.2E-02              | 2.25                                          | 0.0445            | 2.25                                             |
| Mm.284248 | NM_013653 | Ccl5     | Chemokine (C-C motif) ligand 5                                  | MuRantes/RANTES             | 4.26                 | 8.72                 | 5.2E-02             | 2.4E-03              | 22.05                                         | 0.0041            | 22.05                                            |
| Mm.21767  | NM_009868 | Cdh5     | Cadherin 5                                                      | 7B4/AA408225                | 3.00                 | 5.47                 | 1.3E-01             | 2.3E-02              | 5.55                                          | 0.0283            | 5.55                                             |
| Mm.11778  | NM_009805 | Cflar    | CASP8 and FADD-like apoptosis regulator                         | 2310024N18Rik/A430105C05RIK | 4.06                 | 5.57                 | 6.0E-02             | 2.1E-02              | 2.84                                          | 0.0247            | 2.84                                             |
| Mm.218009 | NM_009950 | Cradd    | CASP2 and RIPK1 domain containing adaptor with death domain     | RAIDD                       | 4.78                 | 7.57                 | 3.6E-02             | 5.3E-03              | 6.90                                          | 0.0051            | 6.90                                             |
| Mm.4922   | NM_009969 | Csf2     | Colony stimulating factor 2 (granulocyte-macrophage)            | Csfgm/Gm-CSf                | 4.61                 | 7.17                 | 4.1E-02             | 7.0E-03              | 5.91                                          | 0.0123            | 5.91                                             |
| Mm.103711 | NM_009142 | Cx3cl1   | Chemokine (C-X3-C motif) ligand 1                               | AB030188/ABCD-3             | 4.78                 | 5.18                 | 3.6E-02             | 2.8E-02              | 1.32                                          | 0.5430            | 1.32                                             |
| Mm.284855 | NM_007902 | Edn2     | Endothelin 2                                                    | VIC                         | 4.78                 | 8.72                 | 3.6E-02             | 2.4E-03              | 15.36                                         | 0.0011            | 15.36                                            |
| Mm.283168 | NM_010332 | Ednra    | Endothelin receptor type A                                      | ET-AR/ETa                   | 4.78                 | 6.71                 | 3.6E-02             | 9.5E-03              | 3.83                                          | 0.0378            | 3.83                                             |
| Mm.1626   | NM_007987 | Fas      | Fas (TNF receptor superfamily member)                           | AI196731/APO-1              | 4.35                 | 4.94                 | 4.9E-02             | 3.3E-02              | 1.51                                          | 0.5068            | 1.51                                             |
| Mm.3355   | NM_010177 | Fasl     | Fas ligand (TNF superfamily, member 6)                          | APT1LG1/CD178               | 4.27                 | 7.19                 | 5.2E-02             | 6.8E-03              | 7.56                                          | 0.0661            | 7.56                                             |
| Mm.241282 | NM_010197 | Fgf1     | Fibroblast growth factor 1                                      | Dffrx/Fam                   | 3.90                 | 4.81                 | 6.7E-02             | 3.6E-02              | 1.88                                          | 0.1802            | 1.88                                             |
| Mm.389712 | NM_010228 | Fit1     | FMS-like tyrosine kinase 1                                      | AI323757/Fit-1              | 4.15                 | 1.19                 | 5.6E-02             | 4.4E-01              | 0.13                                          | 0.0007            | -7.78                                            |
| Mm.193099 | NM_010233 | Fn1      | Fibronectin 1                                                   | E330027I09/Fn               | 0.98                 | 1.71                 | 5.1E-01             | 3.1E-01              | 1.66                                          | 0.1003            | 1.66                                             |
| Mm.435508 | NM_010493 | Icam1    | Intercellular adhesion molecule                                 | CD54/Icam-1                 | 4.25                 | 4.83                 | 5.2E-02             | 3.5E-02              | 1.49                                          | 0.6525            | 1.49                                             |
| Mm.1245   | NM_010510 | Ifnb1    | Interferon beta 1, fibroblast                                   | IFNB/Ifb                    | 4.67                 | 7.59                 | 3.9E-02             | 5.2E-03              | 7.59                                          | 0.0549            | 7.59                                             |
| Mm.35814  | NM_008350 | Il11     | Interleukin 11                                                  | IL-11                       | 4.32                 | 7.96                 | 5.0E-02             | 4.0E-03              | 12.49                                         | 0.0064            | 12.49                                            |
| Mm.983    | NM_010556 | Il3      | Interleukin 3                                                   | BPA/Csfmu                   | 4.78                 | 8.05                 | 3.6E-02             | 3.8E-03              | 9.65                                          | 0.0142            | 9.65                                             |
| Mm.1019   | NM_031168 | Il6      | Interleukin 6                                                   | Il-6                        | 4.78                 | 8.72                 | 3.6E-02             | 2.4E-03              | 15.36                                         | 0.0011            | 15.36                                            |
| Mm.16234  | NM_010577 | Itga5    | Integrin alpha 5 (fibronectin receptor alpha)                   | Cd49e/Fnra                  | 4.43                 | 7.39                 | 4.6E-02             | 6.0E-03              | 7.74                                          | 0.0015            | 7.74                                             |
| Mm.227    | NM_008402 | Itgav    | Integrin alpha V                                                | 1110004F14Rik/2610028E01RIK | 4.43                 | 4.53                 | 4.6E-02             | 4.3E-02              | 1.07                                          | 0.8941            | 1.07                                             |
| Mm.263396 | NM_010578 | Itgb1    | Integrin beta 1 (fibronectin receptor beta)                     | 4633401G24Rik/AA409975      | 2.06                 | 2.68                 | 2.4E-01             | 1.6E-01              | 1.54                                          | 0.0758            | 1.54                                             |
| Mm.285    | NM_010612 | Kdr      | Kinase insert domain protein receptor                           | 6130401C07/Flk-1            | 3.80                 | 2.81                 | 7.2E-02             | 1.4E-01              | 0.50                                          | 0.3507            | -1.99                                            |
| Mm.247073 | NM_021099 | Kit      | Kit oncogene                                                    | Bs/CD117                    | 1.91                 | 4.99                 | 2.7E-01             | 3.1E-02              | 8.47                                          | 0.0025            | 8.47                                             |
| Mm.29564  | NM_008610 | Mmp2     | Matrix metalloproteinase 2                                      | Clg4a/GelA                  | 4.33                 | 7.28                 | 5.0E-02             | 6.5E-03              | 7.72                                          | 0.0409            | 7.72                                             |
| Mm.4406   | NM_013599 | Mmp9     | Matrix metalloproteinase 9                                      | AW743869/B                  | 4.67                 | 8.61                 | 3.9E-02             | 2.6E-03              | 15.32                                         | 0.0012            | 15.32                                            |
| Mm.2740   | NM_008726 | Nppb     | Natriuretic peptide precursor type B                            | AA408272/BNP                | 4.40                 | 8.39                 | 4.7E-02             | 3.0E-03              | 15.83                                         | 0.0003            | 15.83                                            |
| Mm.4807   | NM_008756 | Ocln     | Occludin                                                        | Ocl                         | 4.78                 | 3.01                 | 3.6E-02             | 1.2E-01              | 0.29                                          | 0.0331            | -3.40                                            |
| Mm.221403 | NM_011058 | Pdgfra   | Platelet derived growth factor receptor, alpha polypeptide      | AI115593/CD140a             | 4.78                 | 6.85                 | 3.6E-02             | 8.6E-03              | 4.22                                          | 0.0467            | 4.22                                             |
| Mm.343951 | NM_008816 | Pecam1   | Platelet/endothelial cell adhesion molecule 1                   | Cd31/PECAM-1                | 4.48                 | 3.42                 | 4.5E-02             | 9.4E-02              | 0.48                                          | 0.1114            | -2.09                                            |
| Mm.4809   | NM_008827 | Pgf      | Placental growth factor                                         | AI854365/Plgf               | 3.08                 | 6.36                 | 1.2E-01             | 1.2E-02              | 9.74                                          | 0.0196            | 9.74                                             |
| Mm.154660 | NM_008872 | Plat     | Plasminogen activator, tissue                                   | AU020998/AW212668           | 4.49                 | 4.32                 | 4.4E-02             | 5.0E-02              | 0.88                                          | 0.8076            | -1.13                                            |
| Mm.4183   | NM_008873 | Plau     | Plasminogen activator, urokinase                                | u-PA/uPA                    | 3.76                 | 8.12                 | 7.4E-02             | 3.6E-03              | 20.52                                         | 0.0028            | 20.52                                            |
| Mm.2339   | NM_008968 | Ptgis    | Prostaglandin I2 (prostacyclin) synthase                        | Cyp8/Cyp8a1                 | 4.40                 | 7.62                 | 4.7E-02             | 5.1E-03              | 9.35                                          | 0.0007            | 9.35                                             |
| Mm.687    | NM_007483 | Rhob     | Ras homolog gene family, member B                               | AA017882/Arh6               | 3.28                 | 7.36                 | 1.0E-01             | 6.1E-03              | 16.88                                         | 0.0163            | 16.88                                            |
| Mm.374799 | NM_009068 | Ripk1    | Receptor (TNFRSF)-interacting serine-threonine kinase 1         | D330015H01Rik/RIP           | 4.36                 | 6.94                 | 4.9E-02             | 8.1E-03              | 6.00                                          | 0.0081            | 6.00                                             |
| Mm.5245   | NM_011345 | Sele     | Selectin, endothelial cell                                      | CD62E/E-selectin            | 2.72                 | 5.84                 | 1.5E-01             | 1.8E-02              | 8.65                                          | 0.0447            | 8.65                                             |
| Mm.1461   | NM_011346 | Sell     | Selectin, lymphocyte                                            | AI528707/CD62L              | 3.74                 | 7.51                 | 7.5E-02             | 5.5E-03              | 13.60                                         | 0.0022            | 13.60                                            |
| Mm.332590 | NM_009151 | Selp1g   | Selectin, platelet (p-selectin) ligand                          | CD162/Ps1g-1                | 4.78                 | 7.97                 | 3.6E-02             | 4.0E-03              | 9.16                                          | 0.0022            | 9.16                                             |
| Mm.250422 | NM_008871 | Serpine1 | Serine (or cysteine) peptidase inhibitor, clade E, member 1     | PAI-1/PAI1                  | 3.22                 | 6.52                 | 1.1E-01             | 1.1E-02              | 9.86                                          | 0.0031            | 9.86                                             |
| Mm.248380 | NM_011577 | Tgfb1    | Transforming growth factor, beta 1                              | TGF-beta1/Tgfb              | 2.91                 | 5.06                 | 1.3E-01             | 3.0E-02              | 4.45                                          | 0.0562            | 4.45                                             |
| Mm.24096  | NM_009378 | Thbd     | Thrombomodulin                                                  | AI385582/CD141              | 4.42                 | 6.73                 | 4.7E-02             | 9.4E-03              | 4.94                                          | 0.0262            | 4.94                                             |
| Mm.4159   | NM_011580 | Thbs1    | Thrombospondin 1                                                | TSP-1/TSP1                  | 2.31                 | 8.17                 | 2.0E-01             | 3.5E-03              | 58.12                                         | 0.0003            | 58.12                                            |
| Mm.1062   | NM_009425 | Tnfsf10  | Tumor necrosis factor (ligand) superfamily, member 10           | A330042I21Rik/AI448571      | 4.78                 | 5.29                 | 3.6E-02             | 2.6E-02              | 1.43                                          | 0.5182            | 1.43                                             |
| Mm.282184 | NM_009505 | Vegfa    | Vascular endothelial growth factor A                            | VEGF-A/VEGF120              | 3.62                 | 3.67                 | 8.1E-02             | 7.8E-02              | 1.03                                          | 0.9456            | 1.03                                             |
| Mm.22339  | NM_011708 | Vwf      | Von Willebrand factor homolog                                   | 6820430P06Rik/AI551257      | 4.19                 | 5.82                 | 5.5E-02             | 1.8E-02              | 3.11                                          | 0.0791            | 3.11                                             |
| Mm.299381 | NM_013556 | Hprt1    | Hypoxanthine guanine phosphoribosyl transferase 1               | C81579/HPGRT                | 2.19                 | 1.61                 | 2.2E-01             | 3.3E-01              | 0.67                                          | 0.2105            | -1.49                                            |
| Mm.2180   | NM_008302 | Hsp90ab1 | Heat shock protein 90kDa alpha (cytosolic), class B member 1    | 90kDa/AL022974              | -0.66                | 0.00                 | 1.6E+00             | 1.0E+00              | 1.58                                          | 0.0703            | 1.58                                             |
| Mm.343110 | NM_008084 | Gapdh    | Glyceraldehyde-3-phosphate dehydrogenase                        | Gapd                        | -0.85                | -0.89                | 1.8E+00             | 1.8E+00              | 0.97                                          | 0.8726            | -1.03                                            |
| Mm.328431 | NM_007393 | Actb     | Actin, beta, cytoplasmic                                        | Actx/E430023M04Rik          | -1.34                | -0.73                | 2.5E+00             | 1.7E+00              | 1.53                                          | 0.0771            | 1.53                                             |
